# Supplementary material for: Potentially Toxic Element Contamination in Soils Affected by the Antimony Mine Spill in Northwest China
Source: MDPI journal article supplement (doi:10.3390/toxics11040359), 2023-04-10
Supplement: s1 [file s1]

Article

# Potentially Toxic Element Contamination in Soils Affected by the Antimony Mine Spill in Northwest China

Yongzhen Chai and Fei Guo

## Supplementary Materials

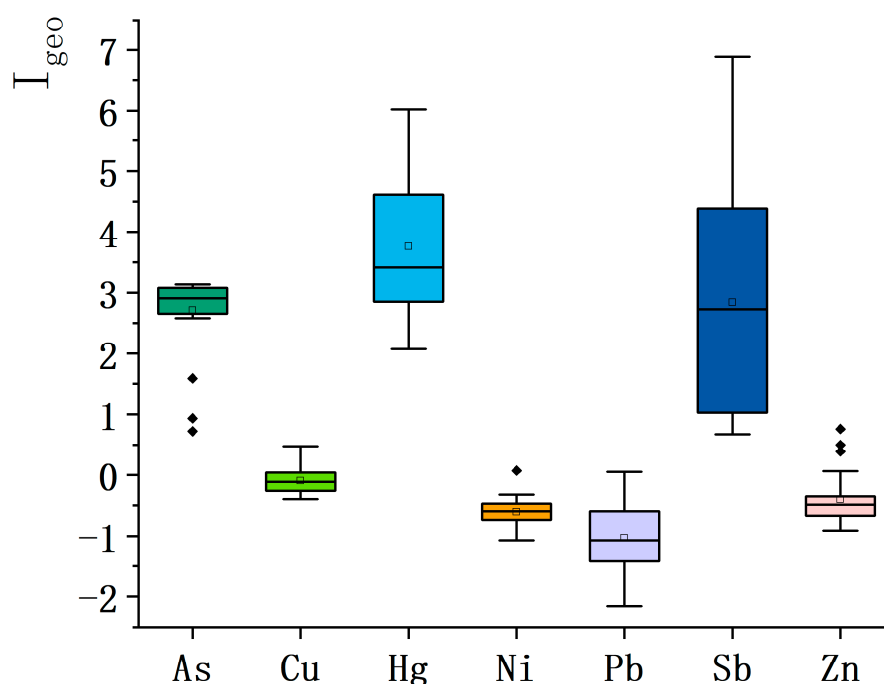

**Figure S1.** Geo-logical accumulation index of the various PTEs.

**Table S1.** Reference material for quality control.

| PTEs | Reference Material Product Number | Concentration (µg/mL) |
|------|-----------------------------------|-----------------------|
| As   | GBW08611                          | 1000                  |
| Cu   | GBW08615                          | 1000                  |
| Hg   | GBW08617                          | 1000                  |
| Ni   | GBW08618                          | 1000                  |
| Pb   | GBW08619                          | 1000                  |
| Sb   | GBW(E)080295                      | 1000                  |
| Zn   | GBW08620                          | 1000                  |

**Table S2.** Human activity parameters.

|                                                 | Child                         | Teenager                      | Adult                         | Description                         | References |
|-------------------------------------------------|-------------------------------|-------------------------------|-------------------------------|-------------------------------------|------------|
| <i>IngR</i> (mg d <sup>-1</sup> )               | 200                           | 150                           | 100                           | Ingestion Rate of Soils             | [40]       |
| <i>InhR</i> (m <sup>3</sup> day <sup>-1</sup> ) | 7.5                           | 11.25                         | 15                            | Inhalation Rate of Soil             | [40]       |
| <i>ED</i> (year)                                | 6                             | 12                            | 26                            | Exposure Duration                   | [40–42]    |
| <i>EF</i> (d year <sup>-1</sup> )               | 350                           | 350                           | 350                           | Exposure Frequency                  | [40]       |
| <i>SA</i> (cm <sup>2</sup> )                    | 2373                          | 4036.5                        | 5700                          | Exposured Skin Area                 | [40]       |
| <i>ABS</i>                                      | 0.001 except for As<br>(0.03) | 0.001 except for As<br>(0.03) | 0.001 except for As<br>(0.03) | Dermal Absorption Factor            | [43,44]    |
| <i>AF</i> (mg cm <sup>-2</sup> )                | 0.2                           | 0.135                         | 0.07                          | Adherence Factor                    | [40]       |
| <i>PEF</i> (m <sup>3</sup> kg <sup>-1</sup> )   | 1.36 × 10 <sup>9</sup>        | 1.36 × 10 <sup>9</sup>        | 0.000296                      | Particle Emission Factor            | [45]       |
| <i>BW</i> (kg)                                  | 11.58                         | 41.33                         | 61.8                          | Average Body Weight                 | [41,42]    |
| <i>AT</i>                                       | 25550                         | 25550                         | 25550                         | Average Time for Carcinogenic (Non- | [40]       |
| <i>(d)</i>                                      | 365 × ED=2190                 | 365 × ED=4380                 | 365 × ED=9490                 | Carcinogenic) Effect                |            |

**Table S3.** Reference dose (RfD) (mg kg<sup>-1</sup> d<sup>-1</sup>) and cancer slope factor (CSF) ((mg kg<sup>-1</sup> d<sup>-1</sup>)<sup>-1</sup>) of potentially toxic elements.

|                           | As                      | Cu                      | Hg                      | Ni                      | Pb                      | Sb                      | Zn                      |
|---------------------------|-------------------------|-------------------------|-------------------------|-------------------------|-------------------------|-------------------------|-------------------------|
| RfD for Ingestion         | 3.00 × 10 <sup>-4</sup> | 4.00 × 10 <sup>-2</sup> | 3.00 × 10 <sup>-4</sup> | 2.00 × 10 <sup>-2</sup> | 3.00 × 10 <sup>-4</sup> | 4.00 × 10 <sup>-4</sup> | 3.00 × 10 <sup>-1</sup> |
| RfD for Dermal Absorption | 1.23 × 10 <sup>-4</sup> | 1.20 × 10 <sup>-2</sup> | 2.10 × 10 <sup>-5</sup> | 5.40 × 10 <sup>-3</sup> | 2.10 × 10 <sup>-5</sup> | -                       | 6.00 × 10 <sup>-2</sup> |
| RfD for Inhalation        | 3.00 × 10 <sup>-4</sup> | 4.02 × 10 <sup>-2</sup> | 8.57 × 10 <sup>-5</sup> | 2.06 × 10 <sup>-2</sup> | 8.57 × 10 <sup>-5</sup> | -                       | 3.00 × 10 <sup>-1</sup> |
| SF for Ingestion          | 1.50                    | -                       | -                       | 1.7                     | 0.0085                  | -                       | -                       |
| SF for Dermal Absorption  | 3.66                    | -                       | -                       | -                       | -                       | -                       | -                       |
| SF for Inhalation         | 15.1                    | -                       | -                       | 8.40 × 10 <sup>-1</sup> | 0.042                   | -                       | -                       |

Date from [40,43,44,49,50].

**Table S4.** The results of the comprehensive potential ecological risk assessment of PTEs in soil and the potential ecological risk indexes of individual elements.

| Site | As     | Cu    | Hg   | Ni      | Pb   | Sb   | Zn   | RI      | Risk level   |
|------|--------|-------|------|---------|------|------|------|---------|--------------|
| S1   | 303.72 | 31.98 | 2.44 | 2810.87 | 1.51 | 3.33 | 1.11 | 3156.72 | High         |
| S2   | 44.66  | 29.7  | 3.03 | 395.15  | 1.71 | 1.49 | 0.85 | 478.33  | Considerable |
| S3   | 9.33   | 11.04 | 3.06 | 2131.15 | 2.13 | 1.57 | 1.37 | 2161.18 | High         |
| S4   | 139.95 | 31.72 | 3.43 | 1326.59 | 1.27 | 1.42 | 0.9  | 1507.12 | High         |
| S5   | 26.4   | 29.31 | 2.96 | 236.32  | 1.67 | 1.03 | 1.96 | 301.41  | Considerable |
| S6   | 14.49  | 22.07 | 2.7  | 495.9   | 1.89 | 1.57 | 1.02 | 541.09  | Considerable |
| S7   | 29.78  | 26.7  | 3.27 | 765.18  | 2.09 | 1.84 | 1.57 | 832.21  | High         |
| S8   | 105.01 | 27.8  | 2.97 | 1135.84 | 1.92 | 2.51 | 1.08 | 1278.64 | High         |
| S9   | 6.55   | 24.56 | 3.46 | 246.66  | 1.97 | 2.52 | 1.07 | 288.56  | Moderate     |
| S10  | 104.22 | 31.36 | 2.84 | 1017.21 | 1.41 | 4.13 | 1.48 | 1164.1  | High         |
| S11  | 23.42  | 31.3  | 2.63 | 1040.05 | 1.42 | 1.14 | 0.94 | 1102.37 | High         |
| S12  | 6.75   | 32.29 | 2.99 | 219.27  | 1.85 | 1.9  | 1.04 | 267.87  | Moderate     |
| S13  | 8.14   | 6.06  | 2.65 | 195.4   | 1.51 | 0.89 | 0.84 | 217.08  | Moderate     |
| S14  | 48.04  | 28.63 | 4.12 | 1628.33 | 1.94 | 1.99 | 1.18 | 1715.69 | High         |
| S15  | 14.69  | 21.97 | 3.14 | 488.97  | 1.66 | 1.96 | 1.02 | 534.89  | Considerable |
| S16  | 472.84 | 31.55 | 3.51 | 3017.23 | 1.84 | 2.65 | 2.54 | 3534    | High         |
| S17  | 13.1   | 30.05 | 2.75 | 339.04  | 1.77 | 3.59 | 1.07 | 392.91  | Considerable |
| S18  | 7.15   | 7.02  | 2.68 | 449.4   | 1.65 | 1.9  | 0.91 | 472.28  | Considerable |
| S19  | 152.26 | 31.01 | 2.99 | 1549.38 | 1.81 | 2.92 | 1.1  | 1743.12 | High         |
| S20  | 58.56  | 26.03 | 3.58 | 332.84  | 1.98 | 2.51 | 1.05 | 428.41  | Considerable |
| S21  | 51.81  | 27.36 | 3.3  | 444.02  | 1.89 | 1.45 | 1.15 | 532.87  | Considerable |
| S22  | 83.57  | 22.88 | 2.75 | 840.93  | 1.61 | 1.74 | 0.8  | 955.96  | High         |
| S23  | 7.54   | 25.2  | 2.45 | 290.16  | 1.53 | 1.55 | 0.92 | 330.64  | Considerable |
| S24  | 6.35   | 27.64 | 2.51 | 603.36  | 1.6  | 2.93 | 0.96 | 646.7   | High         |

|      |        |       |         |        |      |        |      |         |              |
|------|--------|-------|---------|--------|------|--------|------|---------|--------------|
| S25  | 33.94  | 26.01 | 2.51    | 358.57 | 1.67 | 1.4    | 0.98 | 426.63  | Considerable |
| S26  | 8.34   | 29.39 | 4.47    | 717.75 | 2.8  | 2.82   | 2.12 | 770.21  | High         |
| S27  | 6.55   | 23.09 | 2.96    | 336.45 | 1.93 | 1.9    | 1.11 | 375.54  | Considerable |
| Mean | 104.87 | 7.11  | 1118.87 | 5.00   | 3.95 | 248.84 | 1.19 | 1489.82 | High         |

**Table S5.** Principal component analysis results for the tested soils.

| Element                                 | PC1   | PC2   | PC3   |
|-----------------------------------------|-------|-------|-------|
| As                                      | 0.33  | −0.15 | 0.64  |
| Cu                                      | 0.33  | 0.51  | −0.01 |
| Hg                                      | 0.44  | −0.31 | −0.40 |
| Ni                                      | 0.23  | 0.63  | −0.01 |
| Pb                                      | 0.33  | −0.14 | 0.57  |
| Sb                                      | 0.45  | −0.40 | −0.26 |
| Zn                                      | 0.47  | 0.21  | −0.21 |
| Eigenvalues                             | 2.78  | 1.81  | 0.97  |
| Variance Contribution Rate/%            | 39.67 | 25.86 | 13.87 |
| Cumulative Variance Contribution Rate/% | 39.67 | 65.53 | 79.40 |

**Table S6.** Non-carcinogenic risk results for adults contaminated with PTEs. 1,2,3 represent the different routes of exposure, 1 for ingestion, 2 for inhalation, and 3 for dermal contact.

| Site | HQAs1                   | HQAs2                   | HQAs3                   | HQCu1                   | HQCu2                   | HQCu3                   | HQHg1                  | HQHg2                   | HQHg3                   |                         |
|------|-------------------------|-------------------------|-------------------------|-------------------------|-------------------------|-------------------------|------------------------|-------------------------|-------------------------|-------------------------|
| 1    | 8.00                    | 2.21× 10 <sup>−4</sup>  | 2.19× 10 <sup>−1</sup>  | 1.01× 10 <sup>−2</sup>  | 2.77× 10 <sup>−7</sup>  | 7.99× 10 <sup>−5</sup>  | 1.50× 10 <sup>−1</sup> | 1.45× 10 <sup>−5</sup>  | 5.09× 10 <sup>−3</sup>  |                         |
| 2    | 7.43                    | 2.05× 10 <sup>−4</sup>  | 2.03× 10 <sup>−1</sup>  | 1.25× 10 <sup>−2</sup>  | 3.44× 10 <sup>−7</sup>  | 9.92× 10 <sup>−5</sup>  | 2.11× 10 <sup>−2</sup> | 2.04× 10 <sup>−6</sup>  | 7.16× 10 <sup>−4</sup>  |                         |
| 3    | 2.76                    | 7.61× 10 <sup>−5</sup>  | 7.55× 10 <sup>−2</sup>  | 1.27× 10 <sup>−2</sup>  | 3.48× 10 <sup>−7</sup>  | 1.00× 10 <sup>−4</sup>  | 1.14× 10 <sup>−1</sup> | 1.10× 10 <sup>−5</sup>  | 3.86× 10 <sup>−3</sup>  |                         |
| 4    | 7.93                    | 2.19× 10 <sup>−4</sup>  | 2.17× 10 <sup>−1</sup>  | 1.42× 10 <sup>−2</sup>  | 3.90× 10 <sup>−7</sup>  | 1.12× 10 <sup>−4</sup>  | 7.09× 10 <sup>−2</sup> | 6.84× 10 <sup>−6</sup>  | 2.40× 10 <sup>−3</sup>  |                         |
| 5    | 7.33                    | 2.02× 10 <sup>−4</sup>  | 2.00× 10 <sup>−1</sup>  | 1.23× 10 <sup>−2</sup>  | 3.36× 10 <sup>−7</sup>  | 9.69× 10 <sup>−5</sup>  | 1.26× 10 <sup>−2</sup> | 1.22× 10 <sup>−6</sup>  | 4.28× 10 <sup>−4</sup>  |                         |
| 6    | 5.52                    | 1.52× 10 <sup>−4</sup>  | 1.51× 10 <sup>−1</sup>  | 1.12× 10 <sup>−2</sup>  | 3.07× 10 <sup>−7</sup>  | 8.84× 10 <sup>−5</sup>  | 2.65× 10 <sup>−2</sup> | 2.56× 10 <sup>−6</sup>  | 8.98× 10 <sup>−4</sup>  |                         |
| 7    | 6.68                    | 1.84× 10 <sup>−4</sup>  | 1.83× 10 <sup>−1</sup>  | 1.35× 10 <sup>−2</sup>  | 3.71× 10 <sup>−7</sup>  | 1.07× 10 <sup>−4</sup>  | 4.09× 10 <sup>−2</sup> | 3.95× 10 <sup>−6</sup>  | 1.39× 10 <sup>−3</sup>  |                         |
| 8    | 6.95                    | 1.92× 10 <sup>−4</sup>  | 1.90× 10 <sup>−1</sup>  | 1.23× 10 <sup>−2</sup>  | 3.37× 10 <sup>−7</sup>  | 9.73× 10 <sup>−5</sup>  | 6.07× 10 <sup>−2</sup> | 5.86× 10 <sup>−6</sup>  | 2.06× 10 <sup>−3</sup>  |                         |
| 9    | 6.14                    | 1.69× 10 <sup>−4</sup>  | 1.68× 10 <sup>−1</sup>  | 1.43× 10 <sup>−2</sup>  | 3.93× 10 <sup>−7</sup>  | 1.13× 10 <sup>−4</sup>  | 1.32× 10 <sup>−2</sup> | 1.27× 10 <sup>−6</sup>  | 4.47× 10 <sup>−4</sup>  |                         |
| 10   | 7.84                    | 2.16× 10 <sup>−4</sup>  | 2.15× 10 <sup>−1</sup>  | 1.18× 10 <sup>−2</sup>  | 3.23× 10 <sup>−7</sup>  | 9.30× 10 <sup>−5</sup>  | 5.43× 10 <sup>−2</sup> | 5.25× 10 <sup>−6</sup>  | 1.84× 10 <sup>−3</sup>  |                         |
| 11   | 7.83                    | 2.16× 10 <sup>−4</sup>  | 2.14× 10 <sup>−1</sup>  | 1.09× 10 <sup>−2</sup>  | 2.98× 10 <sup>−7</sup>  | 8.60× 10 <sup>−5</sup>  | 5.56× 10 <sup>−2</sup> | 5.36× 10 <sup>−6</sup>  | 1.88× 10 <sup>−3</sup>  |                         |
| 12   | 8.08                    | 2.23× 10 <sup>−4</sup>  | 2.21× 10 <sup>−1</sup>  | 1.24× 10 <sup>−2</sup>  | 3.40× 10 <sup>−7</sup>  | 9.79× 10 <sup>−5</sup>  | 1.17× 10 <sup>−2</sup> | 1.13× 10 <sup>−6</sup>  | 3.97× 10 <sup>−4</sup>  |                         |
| 13   | 1.52                    | 4.18× 10 <sup>−5</sup>  | 4.15× 10 <sup>−2</sup>  | 1.10× 10 <sup>−2</sup>  | 3.01× 10 <sup>−7</sup>  | 8.68× 10 <sup>−5</sup>  | 1.04× 10 <sup>−2</sup> | 1.01× 10 <sup>−6</sup>  | 3.54× 10 <sup>−4</sup>  |                         |
| 14   | 7.16                    | 1.97× 10 <sup>−4</sup>  | 1.96× 10 <sup>−1</sup>  | 1.71× 10 <sup>−2</sup>  | 4.68× 10 <sup>−7</sup>  | 1.35× 10 <sup>−4</sup>  | 8.70× 10 <sup>−2</sup> | 8.40× 10 <sup>−6</sup>  | 2.95× 10 <sup>−3</sup>  |                         |
| 15   | 5.50                    | 1.52× 10 <sup>−4</sup>  | 1.50× 10 <sup>−1</sup>  | 1.30× 10 <sup>−2</sup>  | 3.57× 10 <sup>−7</sup>  | 1.03× 10 <sup>−4</sup>  | 2.61× 10 <sup>−2</sup> | 2.52× 10 <sup>−6</sup>  | 8.86× 10 <sup>−4</sup>  |                         |
| 16   | 7.89                    | 2.18× 10 <sup>−4</sup>  | 2.16× 10 <sup>−1</sup>  | 1.45× 10 <sup>−2</sup>  | 3.99× 10 <sup>−7</sup>  | 1.15× 10 <sup>−4</sup>  | 1.61× 10 <sup>−1</sup> | 1.56× 10 <sup>−5</sup>  | 5.46× 10 <sup>−3</sup>  |                         |
| 17   | 7.52                    | 2.07× 10 <sup>−4</sup>  | 2.06× 10 <sup>−1</sup>  | 1.14× 10 <sup>−2</sup>  | 3.12× 10 <sup>−7</sup>  | 9.01× 10 <sup>−5</sup>  | 1.81× 10 <sup>−2</sup> | 1.75× 10 <sup>−6</sup>  | 6.14× 10 <sup>−4</sup>  |                         |
| 18   | 1.76                    | 4.84× 10 <sup>−5</sup>  | 4.80× 10 <sup>−2</sup>  | 1.11× 10 <sup>−2</sup>  | 3.04× 10 <sup>−7</sup>  | 8.78× 10 <sup>−5</sup>  | 2.40× 10 <sup>−2</sup> | 2.32× 10 <sup>−6</sup>  | 8.14× 10 <sup>−4</sup>  |                         |
| 19   | 7.76                    | 2.14× 10 <sup>−4</sup>  | 2.12× 10 <sup>−1</sup>  | 1.24× 10 <sup>−2</sup>  | 3.40× 10 <sup>−7</sup>  | 9.79× 10 <sup>−5</sup>  | 8.28× 10 <sup>−2</sup> | 7.99× 10 <sup>−6</sup>  | 2.81× 10 <sup>−3</sup>  |                         |
| 20   | 6.51                    | 1.79× 10 <sup>−4</sup>  | 1.78× 10 <sup>−1</sup>  | 1.48× 10 <sup>−2</sup>  | 4.07× 10 <sup>−7</sup>  | 1.17× 10 <sup>−4</sup>  | 1.78× 10 <sup>−2</sup> | 1.72× 10 <sup>−6</sup>  | 6.03× 10 <sup>−4</sup>  |                         |
| 21   | 6.84                    | 1.89× 10 <sup>−4</sup>  | 1.87× 10 <sup>−1</sup>  | 1.37× 10 <sup>−2</sup>  | 3.75× 10 <sup>−7</sup>  | 1.08× 10 <sup>−4</sup>  | 2.37× 10 <sup>−2</sup> | 2.29× 10 <sup>−6</sup>  | 8.05× 10 <sup>−4</sup>  |                         |
| 22   | 5.72                    | 1.58× 10 <sup>−4</sup>  | 1.57× 10 <sup>−1</sup>  | 1.14× 10 <sup>−2</sup>  | 3.12× 10 <sup>−7</sup>  | 9.01× 10 <sup>−5</sup>  | 4.49× 10 <sup>−2</sup> | 4.34× 10 <sup>−6</sup>  | 1.52× 10 <sup>−3</sup>  |                         |
| 23   | 6.30                    | 1.74× 10 <sup>−4</sup>  | 1.72× 10 <sup>−1</sup>  | 1.01× 10 <sup>−2</sup>  | 2.78× 10 <sup>−7</sup>  | 8.02× 10 <sup>−5</sup>  | 1.55× 10 <sup>−2</sup> | 1.50× 10 <sup>−6</sup>  | 5.25× 10 <sup>−4</sup>  |                         |
| 24   | 6.91                    | 1.91× 10 <sup>−4</sup>  | 1.89× 10 <sup>−1</sup>  | 1.04× 10 <sup>−2</sup>  | 2.85× 10 <sup>−7</sup>  | 8.22× 10 <sup>−5</sup>  | 3.22× 10 <sup>−2</sup> | 3.11× 10 <sup>−6</sup>  | 1.09× 10 <sup>−3</sup>  |                         |
| 25   | 6.50                    | 1.79× 10 <sup>−4</sup>  | 1.78× 10 <sup>−1</sup>  | 1.04× 10 <sup>−2</sup>  | 2.85× 10 <sup>−7</sup>  | 8.22× 10 <sup>−5</sup>  | 1.92× 10 <sup>−2</sup> | 1.85× 10 <sup>−6</sup>  | 6.49× 10 <sup>−4</sup>  |                         |
| 26   | 7.35                    | 2.03× 10 <sup>−4</sup>  | 2.01× 10 <sup>−1</sup>  | 1.85× 10 <sup>−2</sup>  | 5.08× 10 <sup>−7</sup>  | 1.46× 10 <sup>−4</sup>  | 3.83× 10 <sup>−2</sup> | 3.70× 10 <sup>−6</sup>  | 1.30× 10 <sup>−3</sup>  |                         |
| 27   | 5.78                    | 1.59× 10 <sup>−4</sup>  | 1.58× 10 <sup>−1</sup>  | 1.23× 10 <sup>−2</sup>  | 3.36× 10 <sup>−7</sup>  | 9.69× 10 <sup>−5</sup>  | 1.80× 10 <sup>−2</sup> | 1.73× 10 <sup>−6</sup>  | 6.09× 10 <sup>−4</sup>  |                         |
| Site | HQNi1                   | HQNi2                   | HQNi3                   | HQPb1                   | HQPb2                   | HQPb3                   | HQSb1                  | HQZn1                   | HQZn2                   | HQZn3                   |
| 1    | 2.03 × 10 <sup>−2</sup> | 5.43 × 10 <sup>−7</sup> | 1.78 × 10 <sup>−4</sup> | 1.27 × 10 <sup>−1</sup> | 3.50 × 10 <sup>−6</sup> | 2.01 × 10 <sup>−3</sup> | 6.33                   | 4.25 × 10 <sup>−3</sup> | 1.17 × 10 <sup>−7</sup> | 5.04 × 10 <sup>−5</sup> |

|    |                       |                       |                       |                       |                       |                       |                       |                       |                       |                       |
|----|-----------------------|-----------------------|-----------------------|-----------------------|-----------------------|-----------------------|-----------------------|-----------------------|-----------------------|-----------------------|
| 2  | $2.29 \times 10^{-2}$ | $6.12 \times 10^{-7}$ | $2.01 \times 10^{-4}$ | $5.68 \times 10^{-2}$ | $1.57 \times 10^{-6}$ | $8.98 \times 10^{-4}$ | $9.32 \times 10^{-1}$ | $3.27 \times 10^{-3}$ | $9.03 \times 10^{-8}$ | $3.88 \times 10^{-5}$ |
| 3  | $2.86 \times 10^{-2}$ | $7.65 \times 10^{-7}$ | $2.51 \times 10^{-4}$ | $5.96 \times 10^{-2}$ | $1.64 \times 10^{-6}$ | $9.43 \times 10^{-4}$ | $1.95 \times 10^{-1}$ | $5.24 \times 10^{-3}$ | $1.45 \times 10^{-7}$ | $6.22 \times 10^{-5}$ |
| 4  | $1.71 \times 10^{-2}$ | $4.57 \times 10^{-7}$ | $1.50 \times 10^{-4}$ | $5.39 \times 10^{-2}$ | $1.49 \times 10^{-6}$ | $8.53 \times 10^{-4}$ | 2.92                  | $3.44 \times 10^{-3}$ | $9.48 \times 10^{-8}$ | $4.08 \times 10^{-5}$ |
| 5  | $2.24 \times 10^{-2}$ | $6.01 \times 10^{-7}$ | $1.97 \times 10^{-4}$ | $3.93 \times 10^{-2}$ | $1.08 \times 10^{-6}$ | $6.21 \times 10^{-4}$ | $5.51 \times 10^{-1}$ | $7.51 \times 10^{-3}$ | $2.07 \times 10^{-7}$ | $8.91 \times 10^{-5}$ |
| 6  | $2.53 \times 10^{-2}$ | $6.76 \times 10^{-7}$ | $2.22 \times 10^{-4}$ | $5.96 \times 10^{-2}$ | $1.64 \times 10^{-6}$ | $9.43 \times 10^{-4}$ | $3.02 \times 10^{-1}$ | $3.90 \times 10^{-3}$ | $1.07 \times 10^{-7}$ | $4.62 \times 10^{-5}$ |
| 7  | $2.79 \times 10^{-2}$ | $7.48 \times 10^{-7}$ | $2.46 \times 10^{-4}$ | $7.00 \times 10^{-2}$ | $1.93 \times 10^{-6}$ | $1.11 \times 10^{-3}$ | $6.21 \times 10^{-1}$ | $6.01 \times 10^{-3}$ | $1.66 \times 10^{-7}$ | $7.13 \times 10^{-5}$ |
| 8  | $2.57 \times 10^{-2}$ | $6.87 \times 10^{-7}$ | $2.26 \times 10^{-4}$ | $9.56 \times 10^{-2}$ | $2.64 \times 10^{-6}$ | $1.51 \times 10^{-3}$ | 2.19                  | $4.13 \times 10^{-3}$ | $1.14 \times 10^{-7}$ | $4.90 \times 10^{-5}$ |
| 9  | $2.63 \times 10^{-2}$ | $7.05 \times 10^{-7}$ | $2.31 \times 10^{-4}$ | $9.61 \times 10^{-2}$ | $2.65 \times 10^{-6}$ | $1.52 \times 10^{-3}$ | $1.37 \times 10^{-1}$ | $4.10 \times 10^{-3}$ | $1.13 \times 10^{-7}$ | $4.86 \times 10^{-5}$ |
| 10 | $1.89 \times 10^{-2}$ | $5.05 \times 10^{-7}$ | $1.66 \times 10^{-4}$ | $1.57 \times 10^{-1}$ | $4.33 \times 10^{-6}$ | $2.49 \times 10^{-3}$ | 2.17                  | $5.65 \times 10^{-3}$ | $1.56 \times 10^{-7}$ | $6.71 \times 10^{-5}$ |
| 11 | $1.91 \times 10^{-2}$ | $5.11 \times 10^{-7}$ | $1.68 \times 10^{-4}$ | $4.33 \times 10^{-2}$ | $1.19 \times 10^{-6}$ | $6.85 \times 10^{-4}$ | $4.89 \times 10^{-1}$ | $3.61 \times 10^{-3}$ | $9.96 \times 10^{-8}$ | $4.29 \times 10^{-5}$ |
| 12 | $2.48 \times 10^{-2}$ | $6.65 \times 10^{-7}$ | $2.18 \times 10^{-4}$ | $7.24 \times 10^{-2}$ | $2.00 \times 10^{-6}$ | $1.15 \times 10^{-3}$ | $1.41 \times 10^{-1}$ | $3.97 \times 10^{-3}$ | $1.09 \times 10^{-7}$ | $4.71 \times 10^{-5}$ |
| 13 | $2.03 \times 10^{-2}$ | $5.43 \times 10^{-7}$ | $1.78 \times 10^{-4}$ | $3.41 \times 10^{-2}$ | $9.39 \times 10^{-7}$ | $5.39 \times 10^{-4}$ | $1.70 \times 10^{-1}$ | $3.20 \times 10^{-3}$ | $8.83 \times 10^{-8}$ | $3.80 \times 10^{-5}$ |
| 14 | $2.60 \times 10^{-2}$ | $6.96 \times 10^{-7}$ | $2.29 \times 10^{-4}$ | $7.57 \times 10^{-2}$ | $2.09 \times 10^{-6}$ | $1.20 \times 10^{-3}$ | 1.00                  | $4.50 \times 10^{-3}$ | $1.24 \times 10^{-7}$ | $5.34 \times 10^{-5}$ |
| 15 | $2.22 \times 10^{-2}$ | $5.94 \times 10^{-7}$ | $1.95 \times 10^{-4}$ | $7.48 \times 10^{-2}$ | $2.06 \times 10^{-6}$ | $1.18 \times 10^{-3}$ | $3.06 \times 10^{-1}$ | $3.91 \times 10^{-3}$ | $1.08 \times 10^{-7}$ | $4.64 \times 10^{-5}$ |
| 16 | $2.47 \times 10^{-2}$ | $6.61 \times 10^{-7}$ | $2.17 \times 10^{-4}$ | $1.01 \times 10^{-1}$ | $2.78 \times 10^{-6}$ | $1.59 \times 10^{-3}$ | 9.86                  | $9.73 \times 10^{-3}$ | $2.68 \times 10^{-7}$ | $1.15 \times 10^{-4}$ |
| 17 | $2.37 \times 10^{-2}$ | $6.34 \times 10^{-7}$ | $2.08 \times 10^{-4}$ | $1.37 \times 10^{-1}$ | $3.77 \times 10^{-6}$ | $2.16 \times 10^{-3}$ | $2.73 \times 10^{-1}$ | $4.10 \times 10^{-3}$ | $1.13 \times 10^{-7}$ | $4.87 \times 10^{-5}$ |
| 18 | $2.21 \times 10^{-2}$ | $5.92 \times 10^{-7}$ | $1.94 \times 10^{-4}$ | $7.24 \times 10^{-2}$ | $2.00 \times 10^{-6}$ | $1.15 \times 10^{-3}$ | $1.49 \times 10^{-1}$ | $3.47 \times 10^{-3}$ | $9.57 \times 10^{-8}$ | $4.12 \times 10^{-5}$ |
| 19 | $2.43 \times 10^{-2}$ | $6.50 \times 10^{-7}$ | $2.13 \times 10^{-4}$ | $1.11 \times 10^{-1}$ | $3.07 \times 10^{-6}$ | $1.76 \times 10^{-3}$ | 3.18                  | $4.21 \times 10^{-3}$ | $1.16 \times 10^{-7}$ | $5.00 \times 10^{-5}$ |
| 20 | $2.65 \times 10^{-2}$ | $7.09 \times 10^{-7}$ | $2.33 \times 10^{-4}$ | $9.56 \times 10^{-2}$ | $2.64 \times 10^{-6}$ | $1.51 \times 10^{-3}$ | 1.22                  | $4.01 \times 10^{-3}$ | $1.11 \times 10^{-7}$ | $4.76 \times 10^{-5}$ |
| 21 | $2.53 \times 10^{-2}$ | $6.78 \times 10^{-7}$ | $2.23 \times 10^{-4}$ | $5.54 \times 10^{-2}$ | $1.53 \times 10^{-6}$ | $8.76 \times 10^{-4}$ | 1.08                  | $4.41 \times 10^{-3}$ | $1.21 \times 10^{-7}$ | $5.23 \times 10^{-5}$ |
| 22 | $2.15 \times 10^{-2}$ | $5.76 \times 10^{-7}$ | $1.89 \times 10^{-4}$ | $6.62 \times 10^{-2}$ | $1.83 \times 10^{-6}$ | $1.05 \times 10^{-3}$ | 1.74                  | $3.05 \times 10^{-3}$ | $8.42 \times 10^{-8}$ | $3.62 \times 10^{-5}$ |
| 23 | $2.05 \times 10^{-2}$ | $5.48 \times 10^{-7}$ | $1.80 \times 10^{-4}$ | $5.91 \times 10^{-2}$ | $1.63 \times 10^{-6}$ | $9.36 \times 10^{-4}$ | $1.57 \times 10^{-1}$ | $3.53 \times 10^{-3}$ | $9.73 \times 10^{-8}$ | $4.19 \times 10^{-5}$ |
| 24 | $2.14 \times 10^{-2}$ | $5.74 \times 10^{-7}$ | $1.88 \times 10^{-4}$ | $1.12 \times 10^{-1}$ | $3.08 \times 10^{-6}$ | $1.77 \times 10^{-3}$ | $1.32 \times 10^{-1}$ | $3.67 \times 10^{-3}$ | $1.01 \times 10^{-7}$ | $4.35 \times 10^{-5}$ |
| 25 | $2.24 \times 10^{-2}$ | $5.99 \times 10^{-7}$ | $1.97 \times 10^{-4}$ | $5.35 \times 10^{-2}$ | $1.47 \times 10^{-6}$ | $8.46 \times 10^{-4}$ | $7.08 \times 10^{-1}$ | $3.74 \times 10^{-3}$ | $1.03 \times 10^{-7}$ | $4.44 \times 10^{-5}$ |
| 26 | $3.75 \times 10^{-2}$ | $1.00 \times 10^{-6}$ | $3.30 \times 10^{-4}$ | $1.07 \times 10^{-1}$ | $2.96 \times 10^{-6}$ | $1.70 \times 10^{-3}$ | $1.74 \times 10^{-1}$ | $8.11 \times 10^{-3}$ | $2.24 \times 10^{-7}$ | $9.62 \times 10^{-5}$ |
| 27 | $2.58 \times 10^{-2}$ | $6.92 \times 10^{-7}$ | $2.27 \times 10^{-4}$ | $7.24 \times 10^{-2}$ | $2.00 \times 10^{-6}$ | $1.15 \times 10^{-3}$ | $1.37 \times 10^{-1}$ | $4.23 \times 10^{-3}$ | $1.17 \times 10^{-7}$ | $5.02 \times 10^{-5}$ |

(continued from the above table)
